# Supplementary material for: A mononuclear MnIII/‘bis-tris’ complex and its conversion to a mixed-valence MnII/III5cluster
Source: Royal Society of Chemistry journal article supplement (doi:10.1039/b810701g), 2008-10-23
Supplement: b810701g.pdf [file b810701g.pdf]

## SUPPORTING INFORMATION

### A mononuclear Mn<sup>III</sup>/'bis-tris' complex and its conversion to a mixed-valence Mn<sup>II/III</sup><sub>5</sub> cluster

Theocharis C. Stamatatos, Khalil A. Abboud, and George Christou\*

Department of Chemistry, University of Florida, Gainesville, Florida, 32611-7200, USA.

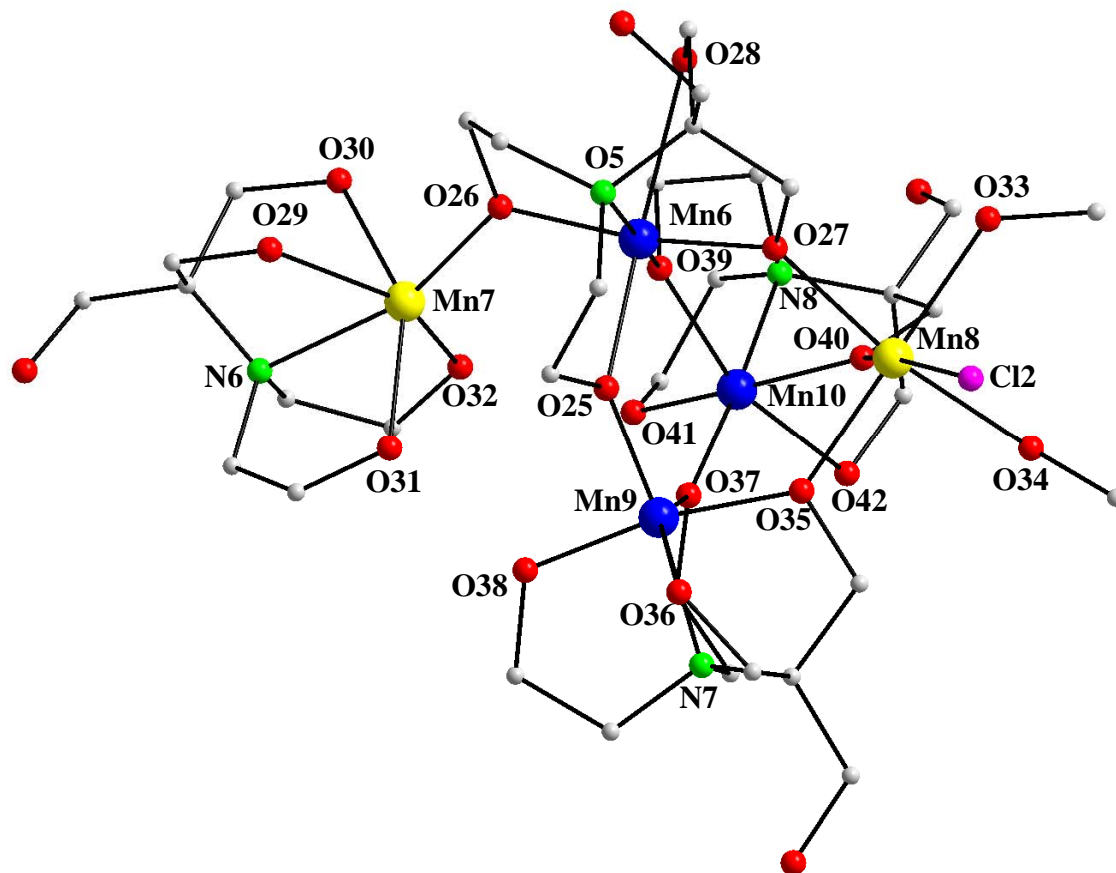

**Fig. S1** Labeled PovRay representation of complex **2b**, with H atoms omitted for clarity. Colour scheme: Mn<sup>II</sup> yellow; Mn<sup>III</sup> blue; Cl pink, O red; N green; C grey.

**Table S1.** Selected interatomic distances (Å) and angles (°) for **2b**·2MeOH

|                    |          |                    |          |
|--------------------|----------|--------------------|----------|
| Mn(6)-O(25)        | 2.135(3) | Mn(8)-O(35)        | 2.158(3) |
| Mn(6)-O(26)        | 1.904(4) | Mn(8)-O(40)        | 2.189(4) |
| Mn(6)-O(27)        | 1.916(4) | Mn(8)-Cl(2)        | 2.501(2) |
| Mn(6)-O(28)        | 2.424(4) | Mn(9)-O(25)        | 1.893(3) |
| Mn(6)-O(39)        | 1.891(4) | Mn(9)-O(35)        | 1.924(4) |
| Mn(6)-N(5)         | 2.057(4) | Mn(9)-O(36)        | 2.396(4) |
| Mn(7)-O(26)        | 2.078(4) | Mn(9)-O(37)        | 2.140(3) |
| Mn(7)-O(29)        | 2.277(4) | Mn(9)-O(38)        | 1.887(4) |
| Mn(7)-O(30)        | 2.163(5) | Mn(9)-N(7)         | 2.053(4) |
| Mn(7)-O(31)        | 2.141(5) | Mn(10)-O(37)       | 1.885(3) |
| Mn(7)-O(32)        | 2.158(5) | Mn(10)-O(39)       | 2.150(4) |
| Mn(7)-N(6)         | 2.331(5) | Mn(10)-O(40)       | 1.926(4) |
| Mn(8)-O(27)        | 2.176(4) | Mn(10)-O(41)       | 1.877(4) |
| Mn(8)-O(33)        | 2.214(4) | Mn(10)-O(42)       | 2.381(4) |
| Mn(8)-O(34)        | 2.317(4) | Mn(5)-N(8)         | 2.059(4) |
| Mn(6)...Mn(7)      | 3.497(3) | Mn(7)...Mn(9)      | 4.718(2) |
| Mn(6)...Mn(8)      | 3.688(1) | Mn(7)...Mn(10)     | 4.728(2) |
| Mn(6)...Mn(9)      | 3.679(2) | Mn(8)...Mn(9)      | 3.726(2) |
| Mn(6)...Mn(10)     | 3.712(2) | Mn(8)...Mn(10)     | 3.704(3) |
| Mn(7)...Mn(8)      | 6.658(3) | Mn(9)...Mn(10)     | 3.742(2) |
| Mn(6)-O(26)-Mn(7)  | 122.8(2) | Mn(8)-O(35)-Mn(9)  | 131.7(2) |
| Mn(6)-O(27)-Mn(8)  | 128.6(2) | Mn(8)-O(40)-Mn(10) | 128.3(2) |
| Mn(6)-O(25)-Mn(9)  | 131.8(2) | Mn(9)-O(37)-Mn(10) | 136.7(2) |
| Mn(6)-O(39)-Mn(10) | 133.3(2) |                    |          |

---

**Table S2.** Bond Valence Sum (BVS)<sup>a</sup> calculations for Mn atoms in **2b**

| Atom | Mn <sup>II</sup> | Mn <sup>III</sup> | Mn <sup>IV</sup> |
|------|------------------|-------------------|------------------|
| Mn6  | 3.169            | <u>2.929</u>      | 3.026            |
| Mn7  | <u>2.000</u>     | 1.844             | 1.913            |
| Mn8  | <u>1.885</u>     | 1.724             | 1.810            |
| Mn9  | 3.198            | <u>2.956</u>      | 3.053            |
| Mn10 | 3.199            | <u>2.956</u>      | 3.054            |

<sup>a</sup> The underlined value is the one closest to the charge for which it was calculated. The oxidation state of a particular atom can be taken as the nearest whole number to the underlined value.

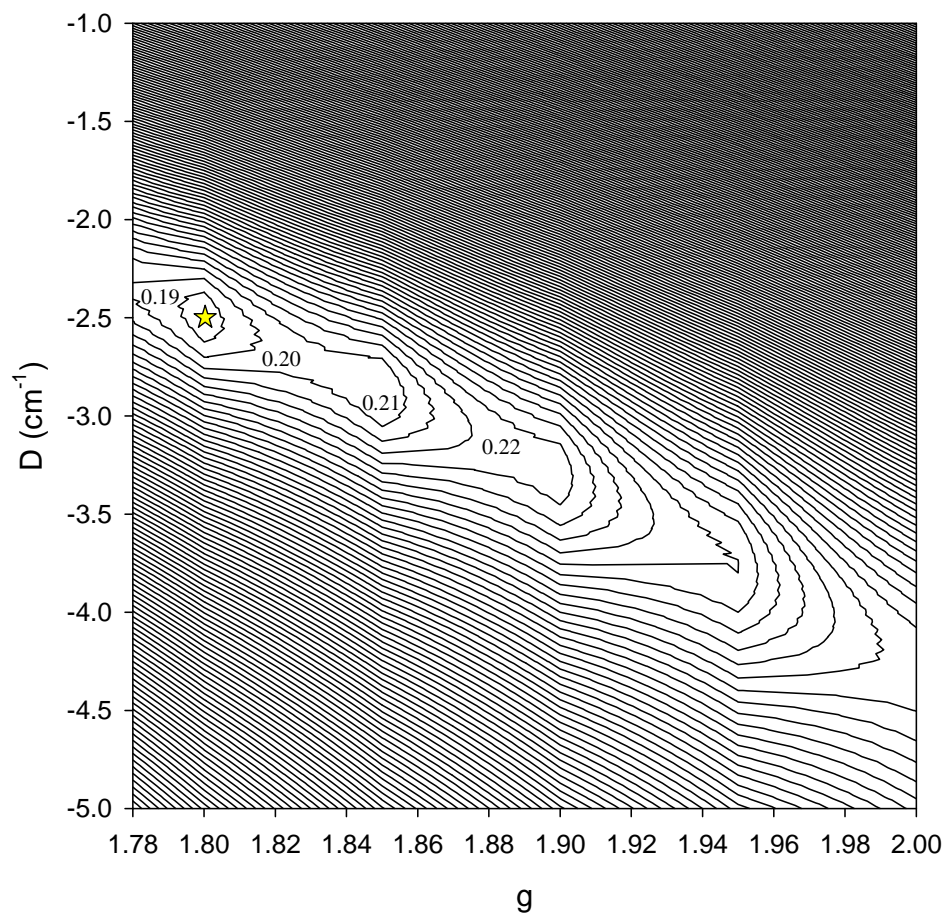

**Fig. S2** Two-dimensional contour plot of the root-mean-square error surface for the  $D$  vs  $g$  fit for complex **1**. The asterisk indicates the best fit (error minimum); see the text for the fit parameters.
